# Supplementary material for: Syntheses, rearrangements, and structural analyses of unsaturated nitrogen donor ligands derived from diphenyldiazomethane and the chiral rhenium Lewis acid [(η5-C5H5)Re(NO)(PPh3)]+
Source: Royal Society of Chemistry journal article supplement (doi:10.1039/d2dt00890d), 2022-01-01
Supplement: d2dt00890d1.pdf [file d2dt00890d1.pdf]

## SUPPORTING INFORMATION FOR

Syntheses, Rearrangements, and Structural Analyses of Unsaturated Nitrogen  
Donor Ligands Derived from Diphenyldiazomethane and the Chiral Rhenium  
Lewis Acid  $[(\eta^5\text{-C}_5\text{H}_5)\text{Re}(\text{NO})(\text{PPh}_3)]^+$

**Alexander L. Estrada,<sup>a,‡</sup> Taveechai Wititsuwannakul,<sup>a,‡</sup> Klemenz Kromm,<sup>b</sup> Frank  
Hampel,<sup>b</sup> Michael B. Hall,<sup>\*a</sup> and John A. Gladysz<sup>\*a,b</sup>**

<sup>a</sup>Department of Chemistry, Texas A&M University, PO Box 30012, College Station, Texas  
77843-3012, USA. E-mail: [gladysz@mail.chem.tamu.edu](mailto:gladysz@mail.chem.tamu.edu)

<sup>b</sup>Institut für Organische Chemie and Interdisciplinary Center for Molecular Materials, Friedrich-  
Alexander-Universität Erlangen-Nürnberg, Henkestraße 42, 91054 Erlangen, Germany

<sup>‡</sup>These authors contributed equally to this work.

## S1. Computational details (continued)

Additional calculations were conducted with the CAM-B3LYP,<sup>s1</sup> M06,<sup>s2</sup> and BP86<sup>s3</sup> functionals to verify the results derived from the  $\omega$ B97X-D functional. The calculations were performed at the level of CAM-B3LYP/BS2(CPCM)//CAM-B3LYP/BS1, M06/BS2(CPCM)//M06/BS1, or BP86/BS2(CPCM)//BP86/BS1 with solvation corrections for C<sub>6</sub>H<sub>5</sub>Cl with UFF atomic radii in combination with the "Dis", "Rep", and "Cav" keywords.

Furthermore, for *sc*-5<sup>+</sup> and *ac*-5<sup>+</sup>, dispersion corrections were implemented using the D3 version of Grimme's dispersion function with Becke-Johnson damping (referred to as GD3BJ)<sup>s4</sup> at the level of CAM-BLYP-GD3BJ/BS1, BP86-GD3BJ/BS1, CAM-B3LYP-GD3BJ/BS2(CPCM)//CAM-B3LYP-GD3BJ/BS1, or BP86-GD3BJ/BS2(CPCM)//BP86-GD3BJ/BS1 with solvation corrections as described above.

## S2. Structures of and bonding in rhenium complexes

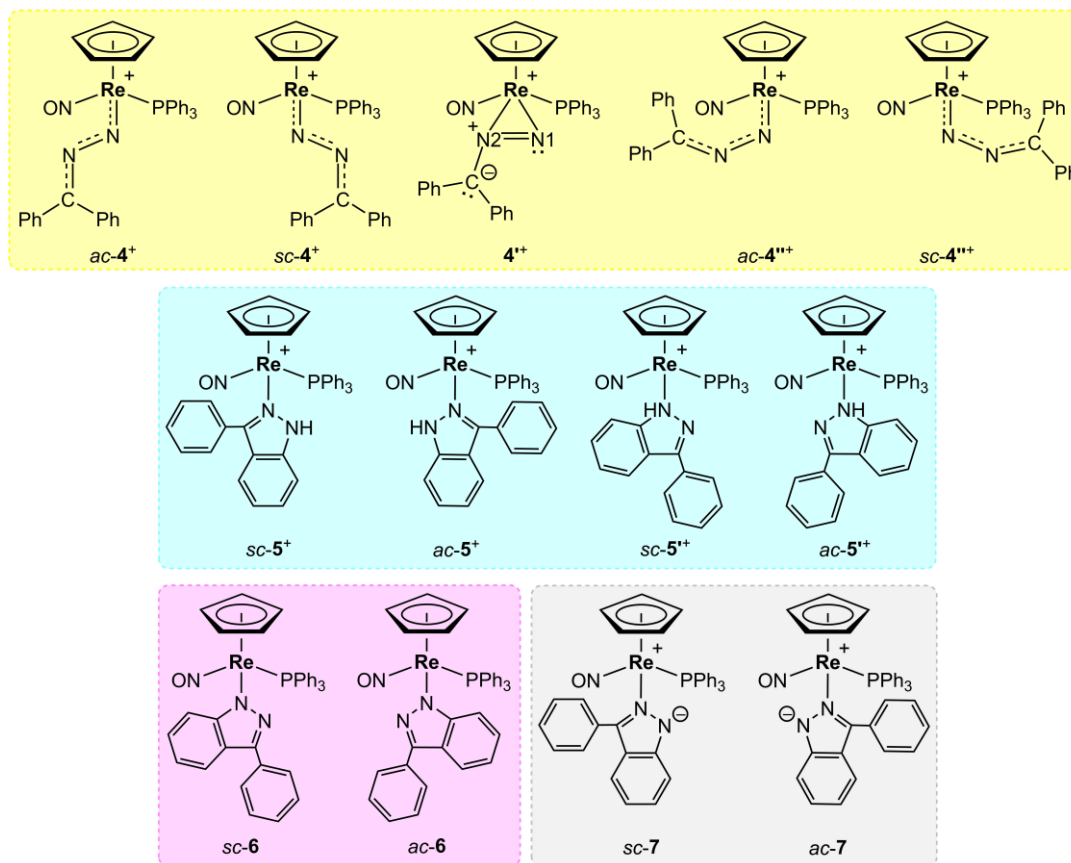

**Figure S1.** Representations of rhenium complexes investigated computationally. Minima for *ac*-4<sup>''+</sup> and *sc*-4<sup>''+</sup> could not be located.

**Table S1.** Re-NN bond lengths (Å) of the gas-phase optimized structures of the complexes in Figure S1 using four different DFT functionals.

| complex                  | experimental data | $\omega$ B97X-D/BS1 <sup>a</sup> | CAM-B3LYP/BS1 <sup>a</sup> | M06/BS1 <sup>a</sup> | BP86/BS1 <sup>a</sup> |
|--------------------------|-------------------|----------------------------------|----------------------------|----------------------|-----------------------|
| <i>ac-4</i> <sup>+</sup> | 1.914(3)          | 1.925                            | 1.930                      | 1.916                | 1.876                 |
| <i>sc-4</i> <sup>+</sup> | -                 | 1.964                            | 1.967                      | 1.956                | 1.909                 |
| <b>4</b> <sup>+</sup>    | -                 | 2.066 <sup>b</sup>               | 2.062 <sup>b</sup>         | 2.063 <sup>b</sup>   | 2.084 <sup>b</sup>    |
|                          |                   | 2.017 <sup>c</sup>               | 2.028 <sup>c</sup>         | 2.027 <sup>c</sup>   | 2.047 <sup>c</sup>    |
| <i>sc-5</i> <sup>+</sup> | 2.137(6)          | 2.131                            | 2.134                      | 2.143                | 2.124                 |
| <i>ac-5</i> <sup>+</sup> | -                 | 2.152                            | 2.156                      | 2.164                | 2.153                 |
| <i>sc-5</i> <sup>+</sup> | -                 | 2.240                            | 2.239                      | 2.257                | 2.257                 |
| <i>ac-5</i> <sup>+</sup> | -                 | 2.253                            | 2.258                      | 2.274                | 2.275                 |
| <i>sc-6</i>              | 2.095(5)          | 2.072                            | 2.070                      | 2.072                | 2.075                 |
| <i>ac-6</i>              | -                 | 2.098                            | 2.099                      | 2.111                | 2.099                 |
| <i>sc-7</i>              | -                 | 2.102                            | 2.100                      | 2.108                | 2.100                 |
| <i>ac-7</i>              | -                 | 2.120                            | 2.122                      | 2.130                | 2.119                 |

<sup>a</sup>BS1 = LANL2DZ+f for the rhenium atom and 6-31G(d,p) for other atoms. <sup>b</sup>Re-N1 (see Figure S2). <sup>c</sup>Re-N2 (see Figure S2).

**Table S2.** N-N bond lengths (Å) of the gas-phase optimized structures of the complexes in Figure S1 using four different DFT functionals.

| complex                  | experimental data | $\omega$ B97X-D/BS1 <sup>a</sup> | CAM-B3LYP/BS1 <sup>a</sup> | M06/BS1 <sup>a</sup> | BP86/BS1 <sup>a</sup> |
|--------------------------|-------------------|----------------------------------|----------------------------|----------------------|-----------------------|
| <i>ac-4</i> <sup>+</sup> | 1.206(4)          | 1.198                            | 1.194                      | 1.207                | 1.234                 |
| <i>sc-4</i> <sup>+</sup> | -                 | 1.191                            | 1.179                      | 1.196                | 1.219                 |
| <b>4</b> <sup>+</sup>    | -                 | 1.264                            | 1.265                      | 1.270                | 1.286                 |
| <i>sc-5</i> <sup>+</sup> | 1.342(8)          | 1.360                            | 1.363                      | 1.364                | 1.384                 |
| <i>ac-5</i> <sup>+</sup> | -                 | 1.364                            | 1.366                      | 1.368                | 1.384                 |
| <i>sc-5</i> <sup>+</sup> | -                 | 1.433                            | 1.440                      | 1.435                | 1.463                 |
| <i>ac-5</i> <sup>+</sup> | -                 | 1.438                            | 1.442                      | 1.437                | 1.463                 |
| <i>sc-6</i>              | 1.379(7)          | 1.352                            | 1.355                      | 1.354                | 1.371                 |
| <i>ac-6</i>              | -                 | 1.353                            | 1.354                      | 1.354                | 1.370                 |
| <i>sc-7</i>              | -                 | 1.351                            | 1.352                      | 1.353                | 1.370                 |
| <i>ac-7</i>              | -                 | 1.354                            | 1.354                      | 1.355                | 1.374                 |

<sup>a</sup>BS1 = LANL2DZ+f for the rhenium atom and 6-31G(d,p) for other atoms.

**Table S3.** Angles (°) between the C<sub>7</sub>N<sub>2</sub> and C<sub>6</sub> least square planes, and distances (Å) between the centroids of the five- and six-membered rings (C<sub>6</sub>(phenyl), C<sub>3</sub>N<sub>2</sub>, C<sub>6</sub>(benzenoid)) of the diphenyldiazomethane, indazole, or indazolyl ligand and that of the proximal PPh<sub>3</sub> phenyl ring (C<sub>6</sub>H<sub>5</sub>), and any NH/ $\pi$  or CH/ $\pi$  interactions.<sup>a,b</sup> Experimental values are given in brackets [] when available.

| complex                   | C <sub>7</sub> N <sub>2</sub> and C <sub>6</sub><br>least square<br>planes | C <sub>6</sub> (phenyl)⋯<br>C <sub>6</sub> H <sub>5</sub><br>centroids | C <sub>3</sub> N <sub>2</sub> ⋯C <sub>6</sub> H <sub>5</sub><br>centroids | C <sub>6</sub> (benzenoid)⋯<br>C <sub>6</sub> H <sub>5</sub> centroids | N⋯(C <sub>6</sub> H <sub>5</sub><br>centroid)                                            | H <sub>N</sub> ⋯(C <sub>6</sub> H <sub>5</sub><br>centroid) <sup>c</sup> | H(phenyl)⋯<br>(C <sub>6</sub> H <sub>5</sub><br>centroid) | H(C <sub>6</sub> H <sub>5</sub> )⋯<br>(C <sub>6</sub> (phenyl)<br>centroid) |
|---------------------------|----------------------------------------------------------------------------|------------------------------------------------------------------------|---------------------------------------------------------------------------|------------------------------------------------------------------------|------------------------------------------------------------------------------------------|--------------------------------------------------------------------------|-----------------------------------------------------------|-----------------------------------------------------------------------------|
| <i>ac-4</i> <sup>+d</sup> | -                                                                          | 3.761<br>[4.056]                                                       | -                                                                         | -                                                                      | 4.203, <sup>e</sup><br>3.768 <sup>f</sup><br>[4.141, <sup>e</sup><br>3.715] <sup>f</sup> | -                                                                        | -                                                         | -                                                                           |
| <i>sc-4</i> <sup>+g</sup> | -                                                                          | -                                                                      | -                                                                         | -                                                                      | 4.007, <sup>e</sup><br>4.167 <sup>f</sup>                                                | -                                                                        | 2.624 <sup>h</sup>                                        | -                                                                           |
| <i>4</i> <sup>+i</sup>    | -                                                                          | -                                                                      | -                                                                         | -                                                                      | 3.820, <sup>e</sup><br>4.794 <sup>f</sup>                                                | -                                                                        | -                                                         | -                                                                           |
| <i>sc-5</i> <sup>+j</sup> | 36.65<br>[23.70]                                                           | -                                                                      | 3.954<br>[3.731]                                                          | 4.596<br>[4.362]                                                       | 4.054, <sup>e</sup><br>4.007 <sup>f</sup><br>[3.879, <sup>e</sup><br>3.613] <sup>f</sup> | 4.263 <sup>k</sup><br>[3.761] <sup>l</sup>                               | -                                                         | -                                                                           |
| <i>ac-5</i> <sup>+</sup>  | 35.12                                                                      | -                                                                      | 4.207                                                                     | 5.053                                                                  | 4.152, <sup>e</sup><br>4.678 <sup>f</sup>                                                | 5.234 <sup>m</sup>                                                       | 2.558 <sup>n</sup>                                        | 2.331 <sup>o</sup>                                                          |
| <i>sc-5</i> <sup>+p</sup> | 8.38                                                                       | -                                                                      | 3.885                                                                     | 3.686                                                                  | 4.512, <sup>e</sup><br>4.476 <sup>f</sup>                                                | -                                                                        | -                                                         | 3.270 <sup>q</sup>                                                          |
| <i>ac-5</i> <sup>+r</sup> | 8.96                                                                       | -                                                                      | 3.787                                                                     | 3.860                                                                  | 4.288, <sup>e</sup><br>4.392 <sup>f</sup>                                                | -                                                                        | -                                                         | -                                                                           |
| <i>sc-6</i>               | 33.20<br>[42.29]                                                           | -                                                                      | 3.841<br>[4.012]                                                          | 5.048<br>[5.250]                                                       | 3.892, <sup>e</sup><br>3.559 <sup>f</sup><br>[3.969, <sup>e</sup><br>3.671] <sup>f</sup> | -                                                                        | 3.145 <sup>s</sup><br>[3.276] <sup>t</sup>                | -                                                                           |
| <i>ac-6</i>               | 38.49                                                                      | -                                                                      | 3.880                                                                     | 4.223                                                                  | 4.001, <sup>e</sup><br>4.199 <sup>f</sup>                                                | -                                                                        | -                                                         | -                                                                           |

(continued)

Table S3 continued

| complex                  | C <sub>7</sub> N <sub>2</sub> and C <sub>6</sub><br>least square<br>planes | C <sub>6</sub> (phenyl)⋯<br>C <sub>6</sub> H <sub>5</sub><br>centroids | C <sub>3</sub> N <sub>2</sub> ⋯C <sub>6</sub> H <sub>5</sub><br>centroids | C <sub>6</sub> (benzenoid)⋯<br>C <sub>6</sub> H <sub>5</sub> centroids | N⋯(C <sub>6</sub> H <sub>5</sub><br>centroid) | H <sub>N</sub> ⋯(C <sub>6</sub> H <sub>5</sub><br>centroid) <sup>c</sup> | H(phenyl)⋯<br>(C <sub>6</sub> H <sub>5</sub><br>centroid) | H(C <sub>6</sub> H <sub>5</sub> )⋯<br>(C <sub>6</sub> (phenyl)<br>centroid) |
|--------------------------|----------------------------------------------------------------------------|------------------------------------------------------------------------|---------------------------------------------------------------------------|------------------------------------------------------------------------|-----------------------------------------------|--------------------------------------------------------------------------|-----------------------------------------------------------|-----------------------------------------------------------------------------|
| <i>sc-7</i> <sup>u</sup> | 16.39                                                                      | -                                                                      | 3.452                                                                     | 3.793                                                                  | 3.753, <sup>e</sup><br>3.603 <sup>f</sup>     | -                                                                        | -                                                         | -                                                                           |
| <i>ac-7</i>              | 36.46                                                                      | -                                                                      | 4.178                                                                     | 4.963                                                                  | 4.162, <sup>e</sup><br>4.684 <sup>f</sup>     | -                                                                        | 2.564 <sup>v</sup>                                        | 2.289 <sup>w</sup>                                                          |

<sup>a</sup>See Figures S2-S6. <sup>b</sup>All values derived from optimized geometries at the level of  $\omega$ B97X-D/BS1 (BS1 = LANL2DZ+f for the rhenium atom and 6-31G(d,p) for non-metal atoms). <sup>c</sup>Distance N<sub>2</sub>H<sub>1</sub>⋯(C<sub>6</sub>H<sub>5</sub> centroid). <sup>d</sup>Additional angle of the least squares planes of the diphenyldiazomethane and PPh<sub>3</sub> phenyl groups: 5.04° [20.75°]. <sup>e</sup>Distance N<sub>1</sub>⋯(C<sub>6</sub>H<sub>5</sub> centroid). <sup>f</sup>Distance N<sub>2</sub>⋯(C<sub>6</sub>H<sub>5</sub> centroid). <sup>g</sup>Additional distance/angle (C<sub>6</sub>(phenyl) centroid)⋯H-C(C<sub>5</sub>H<sub>5</sub>): 2.712 Å/149.65°. <sup>h</sup>Angle C-H⋯(C<sub>6</sub>H<sub>5</sub> centroid): 155.51°. <sup>i</sup>Additional distance/angle (C<sub>6</sub>(phenyl) centroid)⋯H-C(C<sub>5</sub>H<sub>5</sub>): 2.642 Å/132.22°. <sup>j</sup>Additional distance (C<sub>6</sub>(benzenoid) centroid)⋯O: 3.386 [3.258] Å. <sup>k</sup>Angle N<sub>2</sub>-H<sub>1</sub>⋯(C<sub>6</sub>H<sub>5</sub> centroid): 68.59°. <sup>l</sup>Angle N<sub>2</sub>-H<sub>1</sub>⋯(C<sub>6</sub>H<sub>5</sub> centroid): 73.63°. <sup>m</sup>Angle N<sub>2</sub>-H<sub>1</sub>⋯(C<sub>6</sub>H<sub>5</sub> centroid): 51.70°. <sup>n</sup>Angle C-H⋯(C<sub>6</sub>H<sub>5</sub> centroid): 127.75°. <sup>o</sup>Angle C-H⋯(C<sub>6</sub>(phenyl) centroid): 164.44°. <sup>p</sup>Additional distance/angle (C<sub>3</sub>N<sub>2</sub> centroid)⋯H-C(C<sub>6</sub>H<sub>5</sub>): 3.169 Å/146.33°. <sup>q</sup>Angle C-H⋯(C<sub>6</sub>(phenyl) centroid): 133.92°. <sup>r</sup>Additional distance/angle (C<sub>6</sub>(benzenoid) centroid)⋯H-C(C<sub>6</sub>H<sub>5</sub>): 3.197 Å/164.91°. <sup>s</sup>Angle C-H⋯(C<sub>6</sub>H<sub>5</sub> centroid): 128.82°. <sup>t</sup>Angle C-H⋯(C<sub>6</sub>H<sub>5</sub> centroid): 139.66°. <sup>u</sup>Additional distance (C<sub>6</sub>(benzenoid) centroid)⋯O: 3.501 Å. <sup>v</sup>Angle C-H⋯(C<sub>6</sub>H<sub>5</sub> centroid): 127.79°. <sup>w</sup>Angle C-H⋯(C<sub>6</sub>(phenyl) centroid): 163.43°.

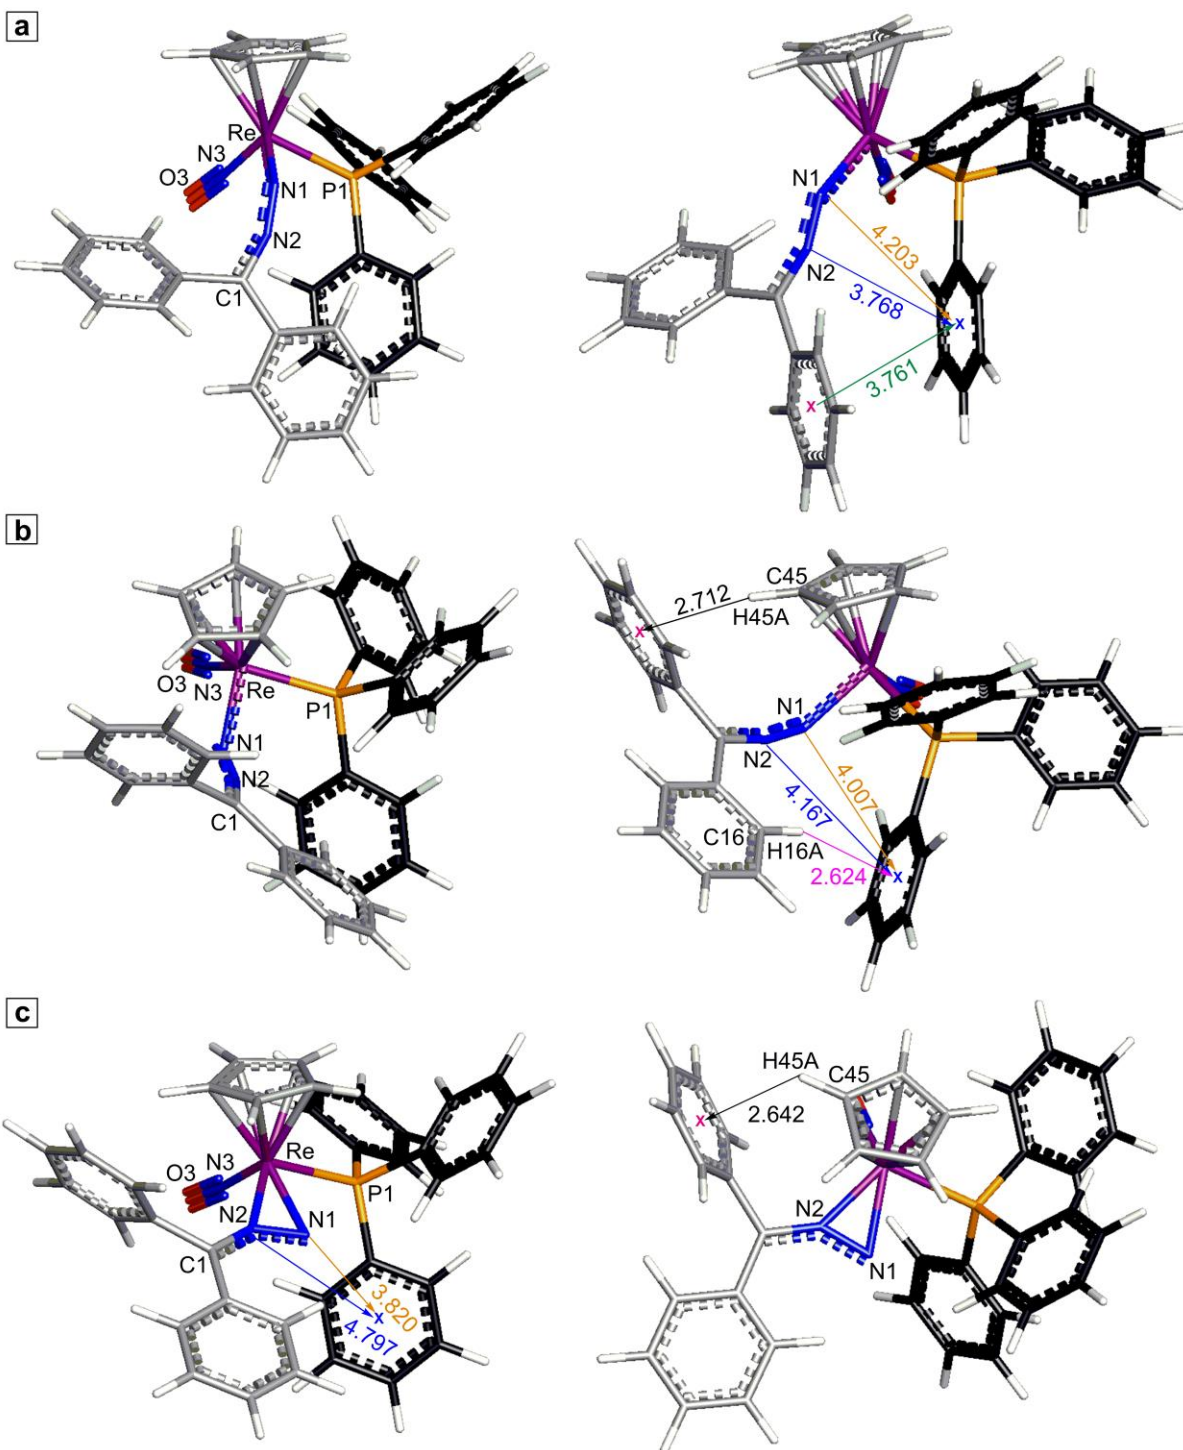

**Figure S2.** Optimized geometries of (a) *ac*-4<sup>+</sup>, (b) *sc*-4<sup>+</sup>, and (c) 4<sup>+</sup>. The distances (Å) between the centroids associated with a phenyl ring (C<sub>6</sub>(phenyl)) of the diphenyldiazomethane ligand and the proximal PPh<sub>3</sub> phenyl ring, and the nitrogen atoms (N1 and N2) of the diphenyldiazomethane ligand and the centroid of the proximal PPh<sub>3</sub> phenyl ring, are shown in green, orange, and blue, respectively. The distances from a hydrogen atom (H45A) of the cyclopentadienyl ligand to the centroid of a phenyl ring of the diphenyldiazomethane ligand and from the hydrogen atom (H16A) of the phenyl ring of the diphenyldiazomethane ligand to the centroid of the proximal PPh<sub>3</sub> phenyl ring are shown in black and magenta, respectively. The C45-H45A⋯(C<sub>6</sub>(phenyl) centroid) angles of *sc*-4<sup>+</sup> and 4<sup>+</sup> and the C16-H16A⋯(C<sub>6</sub>H<sub>5</sub> centroid) angle of *sc*-4<sup>+</sup> are 149.65°, 132.22°, and 155.51°, respectively.

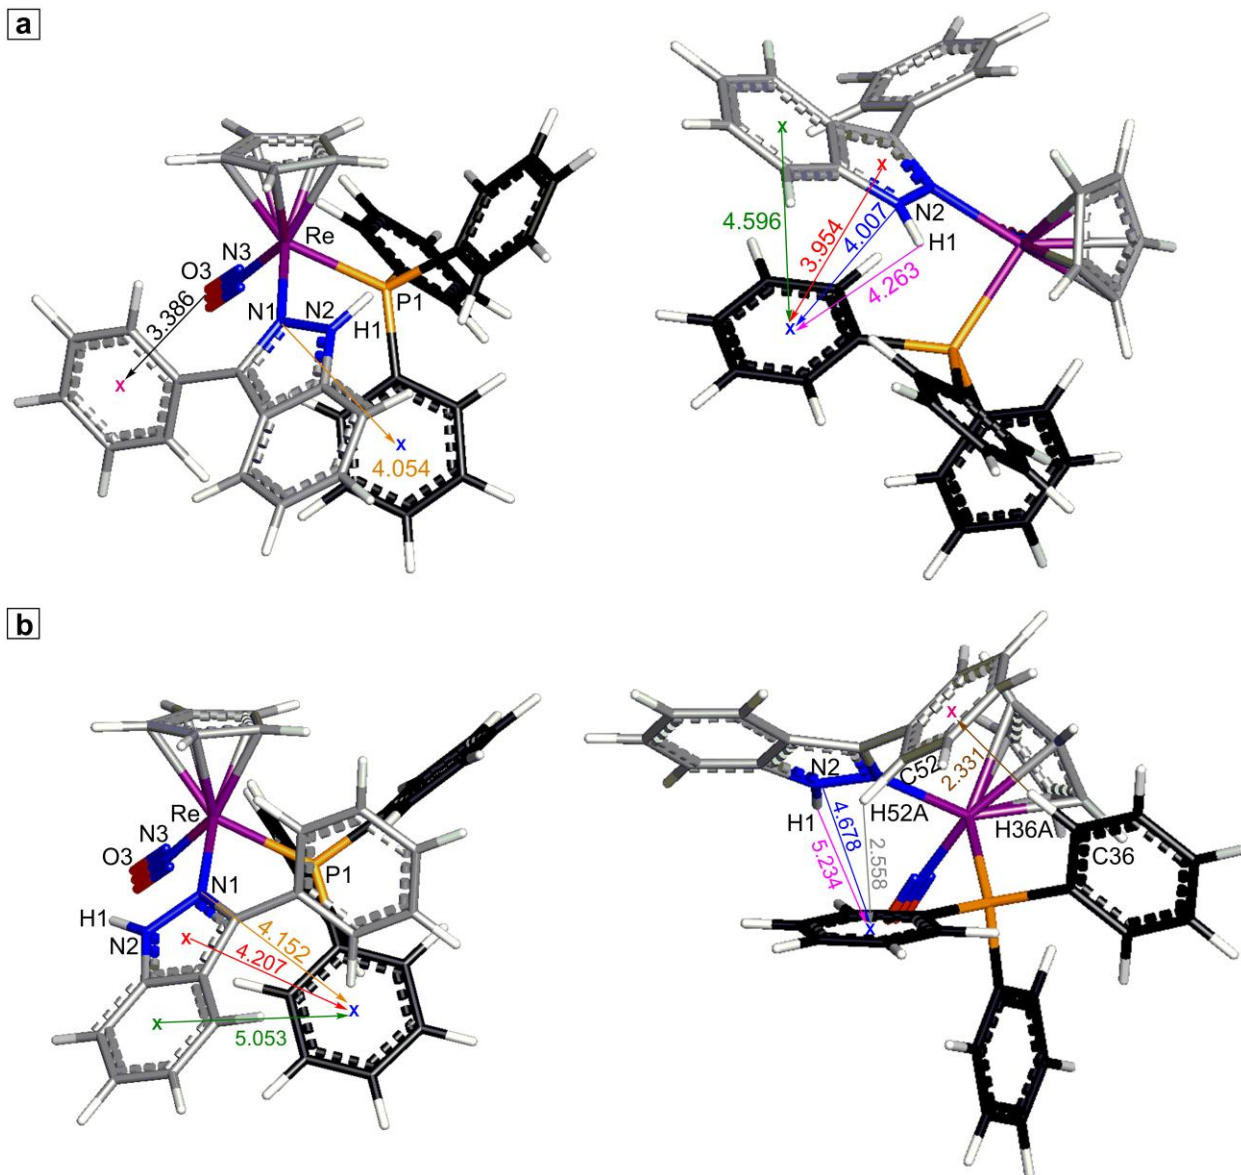

**Figure S3.** Optimized geometries of (a) *sc-5*<sup>+</sup> and (b) *ac-5*<sup>+</sup>. The distances (Å) between the centroids associated with five- and six-membered indazole rings (C<sub>3</sub>N<sub>2</sub> and C<sub>6</sub>(benzenoid)) and the proximal PPh<sub>3</sub> phenyl ring, and from the nitrogen (N1 and N2) and hydrogen (H1) atoms of the indazole ring to the centroid of the proximal PPh<sub>3</sub> phenyl ring, are shown in red, green, orange, blue, and magenta, respectively. The distance from the oxygen atom (O3) to the centroid of the indazole phenyl ring is shown in black. The distances from the hydrogen (H52A) atom of the indazole phenyl ring to the centroid of the proximal PPh<sub>3</sub> phenyl ring and from the hydrogen atom (H36A) of the proximal PPh<sub>3</sub> phenyl ring to the centroid of the indazole phenyl ring are shown in gray and brown, respectively. The C52-H52A⋯(C<sub>6</sub>H<sub>5</sub> centroid) and C36-H36A⋯(C<sub>6</sub>(phenyl) centroid) angles are 127.75° and 164.44°, respectively.



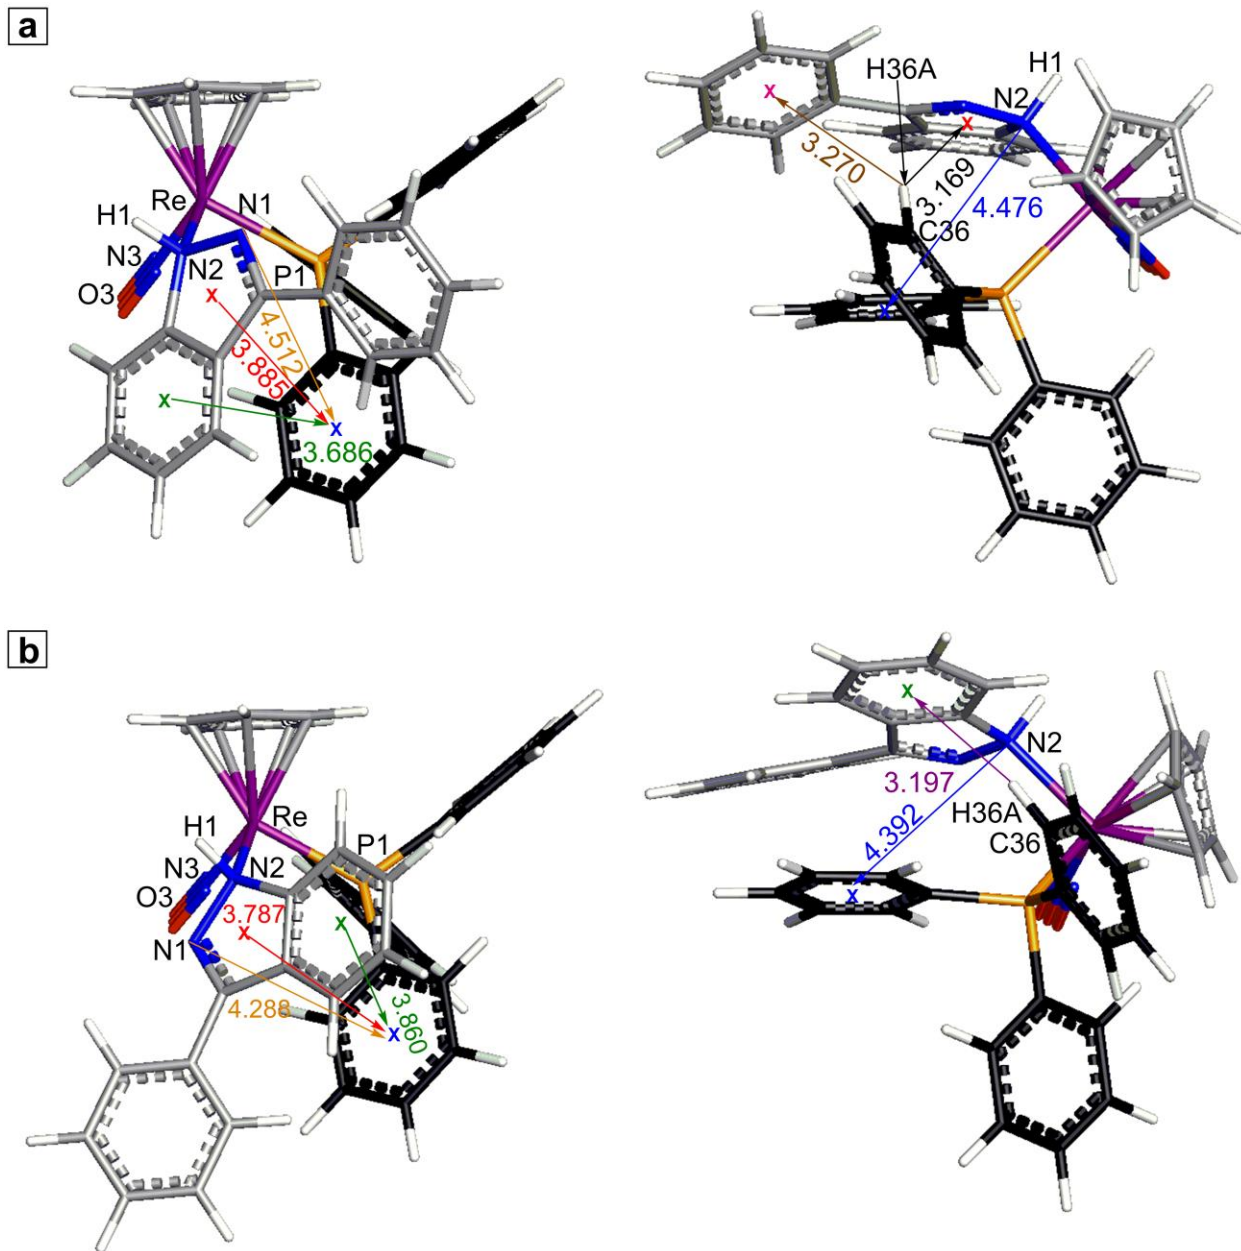

**Figure S4.** Optimized geometries of (a) *sc-5<sup>+</sup>* and (b) *ac-5<sup>+</sup>*. The distances (Å) between the centroids associated with five- and six-membered indazole rings ( $C_3N_2$  and  $C_6(\text{benzenoid})$ ) and the proximal  $PPh_3$  phenyl ring, and from the nitrogen atoms (N1 and N2) of the indazole ring to the centroid of the proximal  $PPh_3$  phenyl ring, are shown in red, green, orange, and blue, respectively. The distances from the hydrogen (H36A) atom of the proximal  $PPh_3$  phenyl ring to the centroids of five- and six-membered indazole rings and the indazole phenyl ring are shown in black, purple, and brown, respectively. The  $C36-H36A \cdots (C_3N_2 \text{ centroid})$ ,  $C36-H36A \cdots (C_6(\text{benzenoid}) \text{ centroid})$ , and  $C36-H36A \cdots (C_6(\text{phenyl}) \text{ centroid})$  angles are  $146.33^\circ$ ,  $164.91^\circ$ , and  $133.92^\circ$ , respectively.



**a**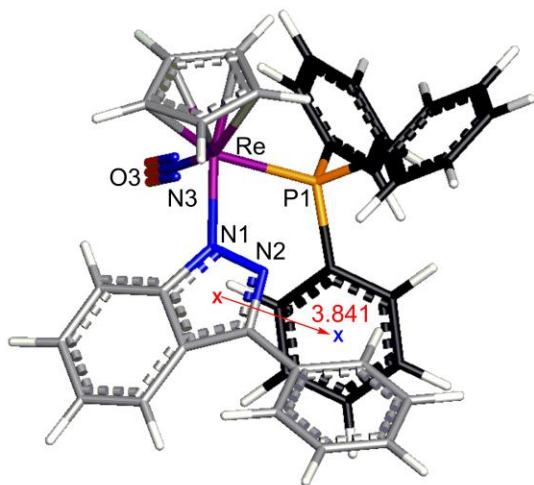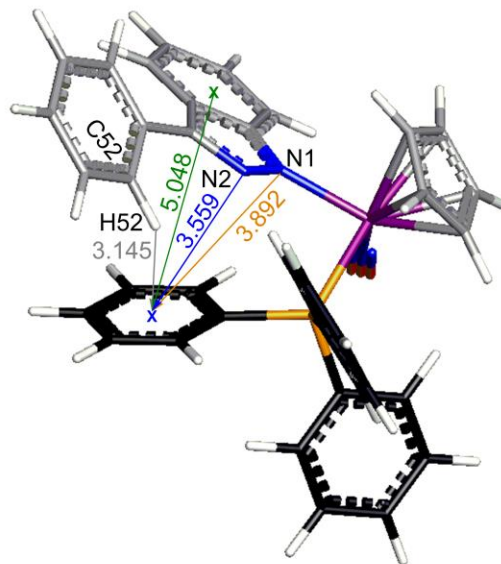**b**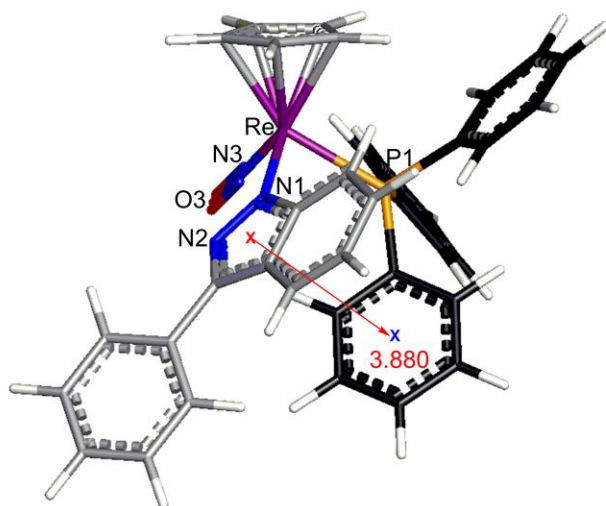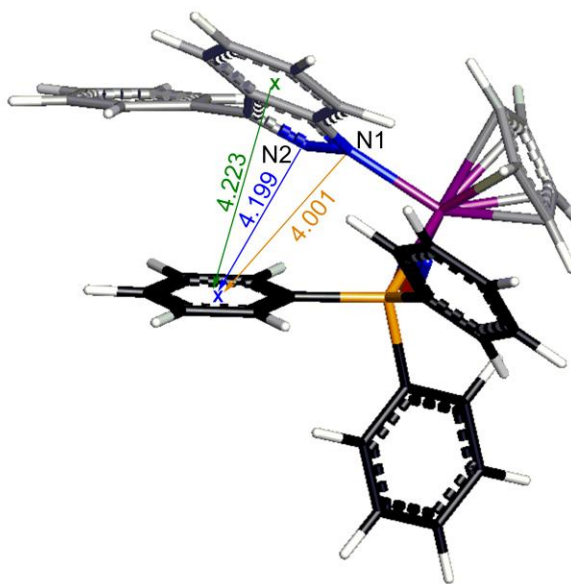

**Figure S5.** Optimized geometries of (a) *sc-6* and (b) *ac-6*. The distances (Å) between the centroids associated with five- and six-membered indazolyl rings ( $C_3N_2$  and  $C_6$ (benzenoid)) and the proximal  $PPh_3$  phenyl ring, and the nitrogen (N1 and N2) and hydrogen (H1) atoms of the indazolyl ring and the centroid of the proximal  $PPh_3$  phenyl ring, are shown in red, green, orange, and blue, respectively. The distance from the hydrogen (H52) atom of the phenyl ring of the indazolyl ligand to the centroid of the proximal  $PPh_3$  phenyl ring is shown in gray. The  $C52-H52 \cdots (C_6H_5)$  centroid) angle is  $128.82^\circ$ .

**a**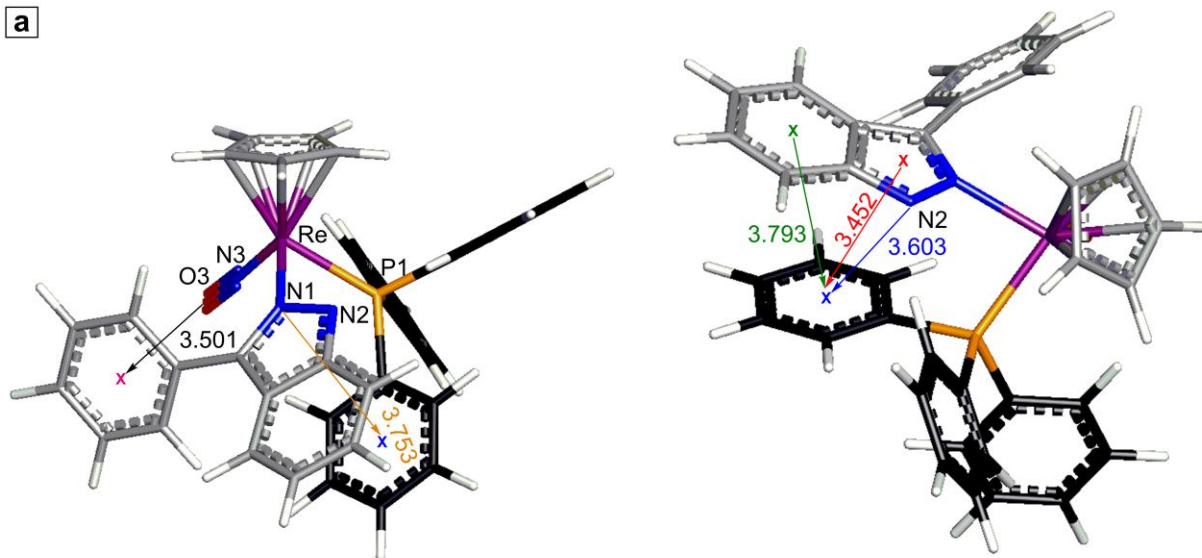**b**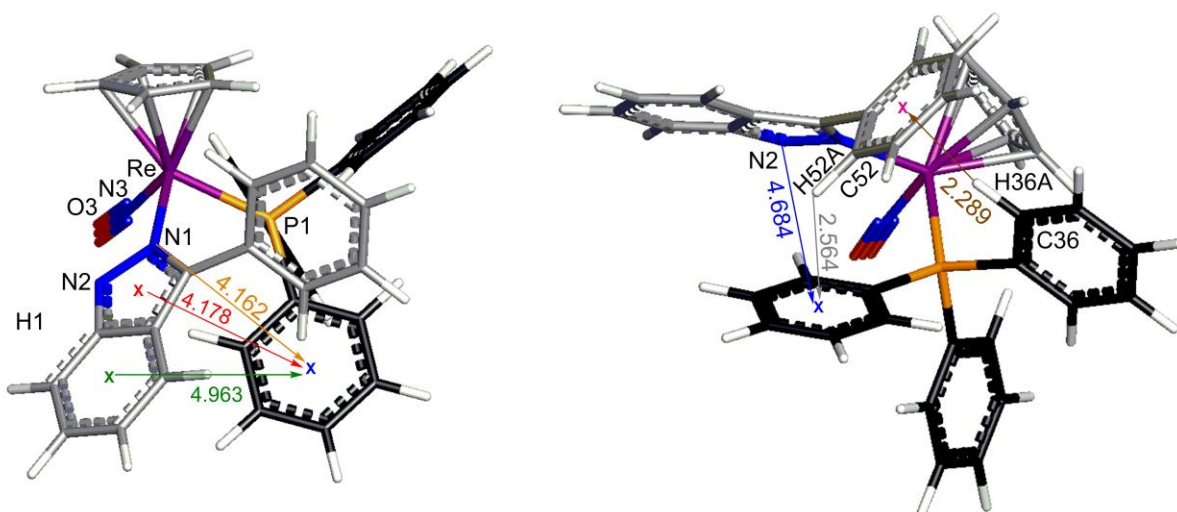

**Figure S6.** Optimized geometries of (a) *sc-7* and (b) *ac-7*. The distances ( $\text{\AA}$ ) between the centroids associated with five- and six-membered indazolyl rings ( $\text{C}_3\text{N}_2$  and  $\text{C}_6(\text{benzenoid})$ ) and the proximal  $\text{PPh}_3$  phenyl ring, and from the nitrogen (N1 and N2) atoms of the indazolyl ring to the centroid of the proximal  $\text{PPh}_3$  phenyl ring, are shown in red, green, orange, and blue, respectively. The distance from the oxygen atom (O3) to the centroid of the indazolyl phenyl ring is shown in black. The distances from the hydrogen (H52A) atom of the indazolyl phenyl ring to the centroid of the proximal  $\text{PPh}_3$  phenyl ring and from the hydrogen atom (H36A) of the proximal  $\text{PPh}_3$  phenyl ring to the centroid of the indazolyl phenyl ring are shown in gray and brown, respectively. The  $\text{C}52\text{-H}52\text{A}\cdots(\text{C}_6\text{H}_5$  centroid) and  $\text{C}36\text{-H}36\text{A}\cdots(\text{C}_6(\text{phenyl})$  centroid) angles are  $127.79^\circ$  and  $163.43^\circ$ , respectively.

**Table S4.** Relative gas-phase free energies ( $\Delta G(\text{gas})$ , kcal/mol) for the species in Figure S1 using four different DFT functionals.<sup>a</sup>

| complex                   | $\omega$ B97X-D/BS1 <sup>b</sup> | CAM-B3LYP/BS1 <sup>b</sup> | M06/BS1 <sup>b</sup> | BP86/BS1 <sup>b</sup> |
|---------------------------|----------------------------------|----------------------------|----------------------|-----------------------|
| <i>ac-4</i> <sup>+</sup>  | 0.0                              | 0.0                        | 0.0                  | 0.0                   |
| <i>sc-4</i> <sup>+</sup>  | 2.8                              | 2.8                        | 3.2                  | 2.1                   |
| <b>4</b> <sup>+</sup>     | 16.3                             | 19.1                       | 16.9                 | 17.8                  |
| <i>sc-5</i> <sup>+</sup>  | 0.0                              | 0.0 <sup>c</sup>           | 0.0                  | 0.0 <sup>d</sup>      |
| <i>ac-5</i> <sup>+</sup>  | -1.0                             | 4.4 <sup>c</sup>           | -2.8                 | 4.3 <sup>d</sup>      |
| <i>sc-5'</i> <sup>+</sup> | 14.9                             | 20.5                       | 14.2                 | 21.1                  |
| <i>ac-5'</i> <sup>+</sup> | 22.0                             | 25.8                       | 19.0                 | 26.0                  |
| <i>sc-6</i>               | 0.0                              | 0.0                        | 0.0                  | 0.0                   |
| <i>ac-6</i>               | 8.9                              | 8.8                        | 8.1                  | 7.2                   |
| <i>sc-7</i>               | 0.0                              | 0.0                        | 0.0                  | 0.0                   |
| <i>ac-7</i>               | 6.7                              | 9.2                        | 6.3                  | 9.1                   |

<sup>a</sup>See also Table S7. <sup>b</sup>BS1 = LANL2DZ+f for the rhenium atom and 6-31G(d,p) for non-metal atoms. <sup>c</sup>The gas-phase free energy of *sc-5*<sup>+</sup> derived from the level of CAM-B3LYP-GD3BJ/BS1 is lower than that of *ac-5*<sup>+</sup> by -1.4 kcal/mol, compared to -4.4 kcal/mol (without the GD3BJ dispersion corrections) derived from the level of CAM-B3LYP/BS1. <sup>d</sup>The gas-phase free energy of *sc-5*<sup>+</sup> derived from the level of BP86-GD3BJ/BS1 is higher than that of *ac-5*<sup>+</sup> by 0.6 kcal/mol, compared to lower by -4.3 kcal/mol (without the GD3BJ dispersion corrections) derived from the level of BP86/BS1. This indicates that steric interactions (including dispersion) render *ac-5*<sup>+</sup> slightly more stable than *sc-5*<sup>+</sup>. This conclusion is consistent with the results of other functionals in this table.

**Table S5.** Relative free energies in C<sub>6</sub>H<sub>5</sub>Cl solution ( $\Delta G(\text{C}_6\text{H}_5\text{Cl})$ , kcal/mol) for the species in Figure S1 using four different DFT functionals.<sup>a</sup>

| complex                  | $\Delta G(\text{C}_6\text{H}_5\text{Cl})$ |                        |                  |                   |
|--------------------------|-------------------------------------------|------------------------|------------------|-------------------|
|                          | $\omega\text{B97X-D}^b$                   | CAM-B3LYP <sup>c</sup> | M06 <sup>d</sup> | BP86 <sup>e</sup> |
| <i>ac-4</i> <sup>+</sup> | 0.0                                       | 0.0                    | 0.0              | 0.0               |
| <i>sc-4</i> <sup>+</sup> | 2.4                                       | 1.5                    | 2.3              | 0.3               |
| <b>4</b> <sup>+</sup>    | 11.1                                      | 13.4                   | 12.7             | 13.1              |
| <i>sc-5</i> <sup>+</sup> | 0.0                                       | 0.0 <sup>f</sup>       | 0.0              | 0.0 <sup>g</sup>  |
| <i>ac-5</i> <sup>+</sup> | -1.2                                      | 2.0 <sup>f</sup>       | -3.4             | 4.3 <sup>g</sup>  |
| <i>sc-5</i> <sup>+</sup> | 16.2                                      | 19.6                   | 15.6             | 22.2              |
| <i>ac-5</i> <sup>+</sup> | 21.0                                      | 22.6                   | 18.5             | 24.6              |
| <i>sc-6</i>              | 0.0                                       | 0.0                    | 0.0              | 0.0               |
| <i>ac-6</i>              | 5.3                                       | 5.5                    | 4.2              | 3.8               |
| <i>sc-7</i>              | 0.0                                       | 0.0                    | 0.0              | 0.0               |
| <i>ac-7</i>              | 3.2                                       | 6.4                    | 2.7              | 7.0               |

<sup>a</sup>See also Table S7. <sup>b</sup>Single point calculations at the level of  $\omega\text{B97X-D/BS2(CPCM)}/\omega\text{B97X-D/BS1}$  with solvation corrections for C<sub>6</sub>H<sub>5</sub>Cl with UFF atomic radii (BS1 = LANL2DZ+f for the rhenium atom and 6-31G(d,p) for non-metal atoms and BS2 = LANL2TZ(f) for the rhenium atom and def2-TZVP for non-metal atoms). <sup>c</sup>Single point calculations at the level of CAM-B3LYP/BS2(CPCM)/CAM-B3LYP/BS1 with solvation corrections for C<sub>6</sub>H<sub>5</sub>Cl with UFF atomic radii. <sup>d</sup>Single point calculations at the level of M06/BS2(CPCM)/M06/BS1 with solvation corrections for C<sub>6</sub>H<sub>5</sub>Cl with UFF atomic radii. <sup>e</sup>Single point calculations at the level of BP86/BS2(CPCM)/BP86/BS1 with solvation corrections for C<sub>6</sub>H<sub>5</sub>Cl with UFF atomic radii. <sup>f</sup>With the GD3BJ dispersion corrections, the solution-phase free energy derived from the level of CAM-B3LYP-GD3BJ/BS2(CPCM)/CAM-B3LYP-GD3BJ/BS1 with solvation corrections for C<sub>6</sub>H<sub>5</sub>Cl with UFF atomic radii for *sc-5*<sup>+</sup> is higher than that for *ac-5*<sup>+</sup> by 1.6 kcal/mol, compared to lower by -2.0 kcal/mol (without the GD3BJ dispersion corrections) derived from the level of CAM-B3LYP/BS2(CPCM)/CAM-B3LYP/BS1 with solvation corrections for C<sub>6</sub>H<sub>5</sub>Cl with UFF atomic radii. <sup>g</sup>With the GD3BJ dispersion corrections, the solution-phase free energy derived from the level of BP86-GD3BJ/BS2(CPCM)/BP86-GD3BJ/BS1 with solvation corrections for C<sub>6</sub>H<sub>5</sub>Cl with UFF atomic radii for *sc-5*<sup>+</sup> is higher than that for *ac-5*<sup>+</sup> by 2.7 kcal/mol, compared to lower by -4.3 kcal/mol (without the GD3BJ dispersion corrections) derived from the level of BP86/BS2(CPCM)/BP86/BS1 with solvation corrections for C<sub>6</sub>H<sub>5</sub>Cl with UFF atomic radii. This indicates that steric interactions (including dispersion) render *ac-5*<sup>+</sup> slightly more stable than *sc-5*<sup>+</sup>. This conclusion is consistent with the results of other functionals in this table.

**Table S6.** Selected Wiberg bond indices for the complexes in Figures S1 and the corresponding computed bond lengths (Å) of the gas-phase optimized structures.<sup>a,b,c</sup> When available, experimental values are given in brackets [].

| complex                  | Wiberg bond index |      |                       | bond length         |                     |                       |
|--------------------------|-------------------|------|-----------------------|---------------------|---------------------|-----------------------|
|                          | Re-NN             | N-N  | N-C(Ph <sub>2</sub> ) | Re-NN               | N-N                 | N-C(Ph <sub>2</sub> ) |
| <i>ac-4</i> <sup>+</sup> | 0.83              | 1.79 | 1.55                  | 1.925<br>[1.914(3)] | 1.198<br>[1.206(4)] | 1.277<br>[1.292(4)]   |
| <i>sc-4</i> <sup>+</sup> | 0.76              | 1.85 | 1.54                  | 1.964               | 1.191               | 1.277                 |
| <b>4</b> <sup>+</sup>    | 0.71 <sup>d</sup> | 1.44 | 1.43                  | 2.066 <sup>d</sup>  | 1.264               | 1.305                 |
|                          | 0.50 <sup>e</sup> |      |                       | 2.017 <sup>e</sup>  |                     |                       |
| <i>sc-5</i> <sup>+</sup> | 0.42              | 1.12 | -                     | 2.131<br>[2.137(6)] | 1.360<br>[1.342(8)] | -                     |
| <i>ac-5</i> <sup>+</sup> | 0.41              | 1.13 | -                     | 2.152               | 1.364               | -                     |
| <i>sc-5</i> <sup>+</sup> | 0.33              | 1.02 | -                     | 2.240               | 1.433               | -                     |
| <i>ac-5</i> <sup>+</sup> | 0.32              | 1.02 | -                     | 2.253               | 1.438               | -                     |
| <i>sc-6</i>              | 0.51              | 1.22 | -                     | 2.072<br>[2.095(5)] | 1.352<br>[1.379(7)] | -                     |
| <i>ac-6</i>              | 0.49              | 1.23 | -                     | 2.098               | 1.353               | -                     |
| <i>sc-7</i>              | 0.48              | 1.24 | -                     | 2.102               | 1.351               | -                     |
| <i>ac-7</i>              | 0.47              | 1.26 | -                     | 2.120               | 1.354               | -                     |

<sup>a</sup>Optimization at the level of ωB97X-D/BS1 (BS1 = LANL2DZ+f for the rhenium atom and 6-31G(d,p) for non-metal atoms). <sup>b</sup>The Wiberg bond indices correlate well with the bond lengths. <sup>c</sup>The computed N-N bond length of dinitrogen (N<sub>2</sub>) is 1.102 Å, and the Wiberg bond index (3.02) is very close to the formal bond order (3). <sup>d</sup>Re-N1 (see Figure S2). <sup>e</sup>Re-N2 (see Figure S2).

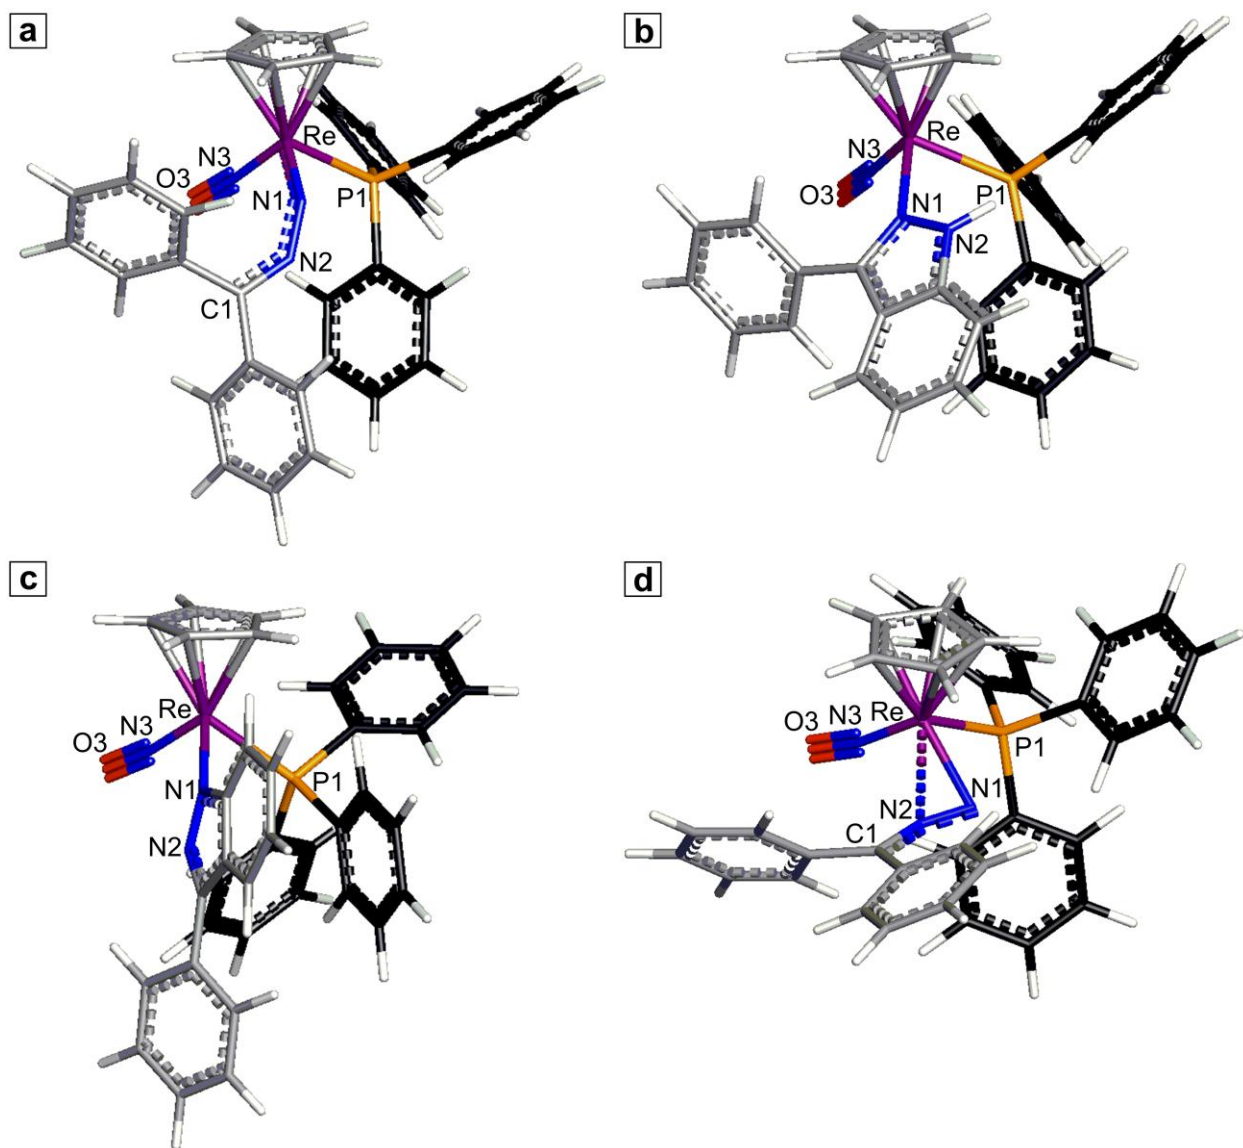

**Figure S7.** Optimized geometries of (a)  $\text{TS}_{\text{rot}a}$  (the transition state for interconverting  $ac\text{-}4^+$  and  $sc\text{-}4^+$ ), (b)  $\text{TS}_{\text{rot}b}$  (the transition state for interconverting  $sc\text{-}5^+$  and  $ac\text{-}5^+$ ), (c)  $\text{TS}_{\text{rot}c}$  (the transition state for interconverting  $sc\text{-}6$  and  $ac\text{-}6$ ), and (d)  $\text{TS}_{\text{ReNd}}$  (the transition state for interconverting  $ac\text{-}4^+$  and  $4^{*+}$ ). Selected distances (Å), angles, and torsion angles (°):  $\text{TS}_{\text{rot}a}$ , Re-N1 1.869, N1-N2 1.246, C1-N2-N1 136.00, N2-N1-Re 131.27, N2-N1-Re-N3 14.57, C1-N2-N1-Re -76.57;  $\text{TS}_{\text{rot}b}$ , Re-N1 2.134, N1-N2 1.366, N2-N1-Re-N3 148.61;  $\text{TS}_{\text{rot}c}$ , Re-N1 2.122, N1-N2 1.349, N2-N1-Re-N3 29.57;  $\text{TS}_{\text{ReNd}}$ , Re-N1 2.165, Re-N2 2.415, N1-N2 1.198, Re-N1-N2 86.78, Re-N2-N1 63.52, N1-Re-N2 29.70. See Table S7 for the energies.



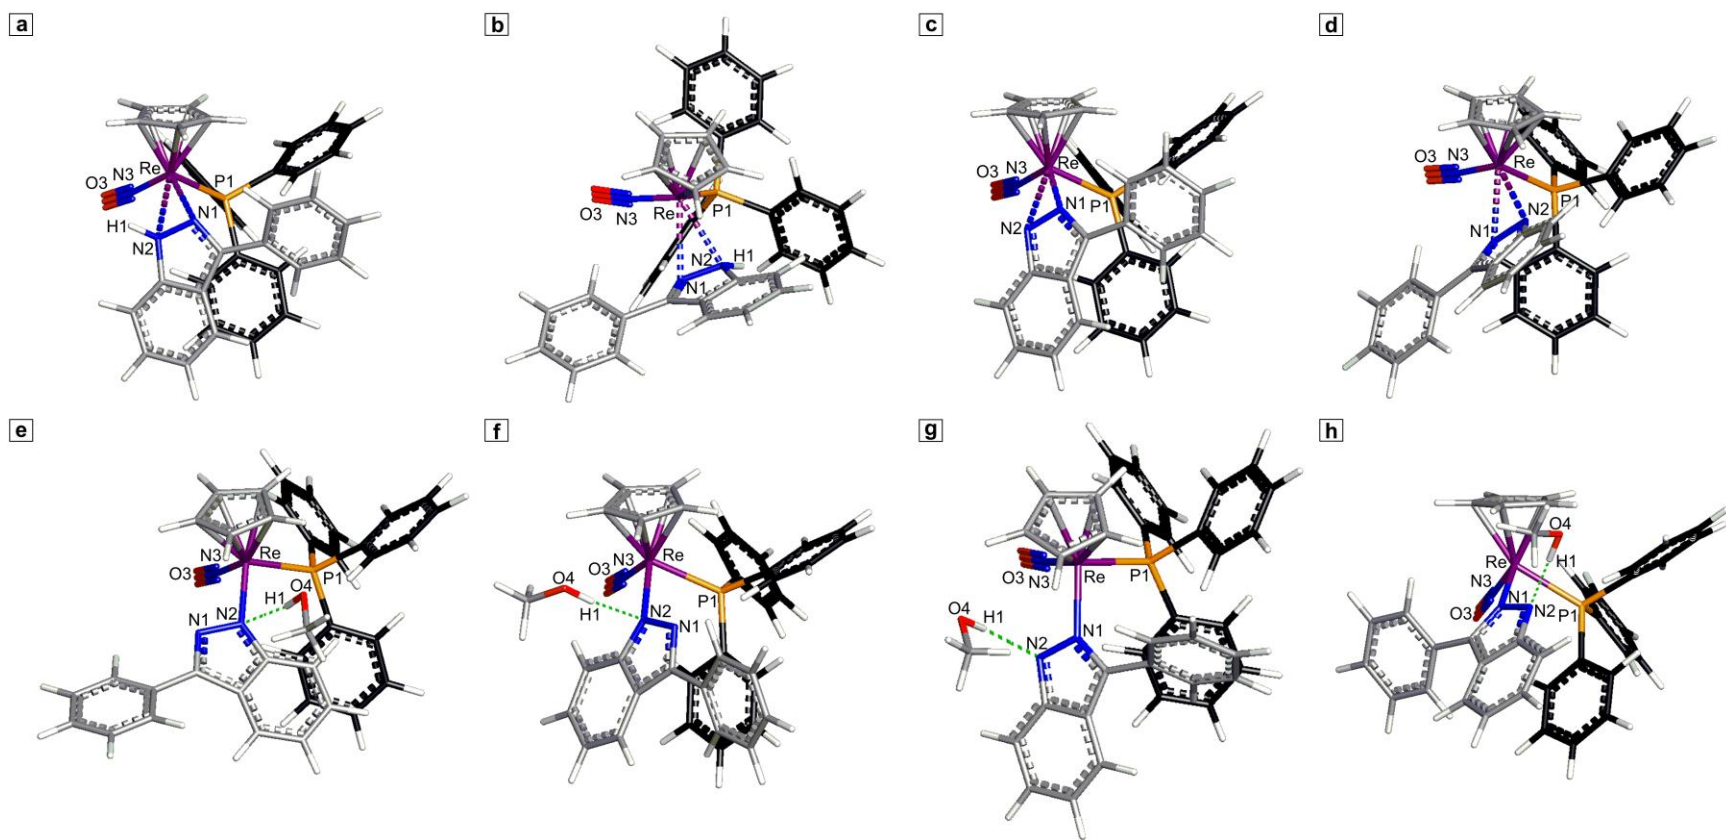

**Figure S8.** Optimized geometries of (a)  $\text{TS}_{\text{ReNe}}$  (the transition state for interconverting  $ac\text{-}5^+$  and  $sc\text{-}5^+$ ), (b)  $\text{TS}_{\text{ReNf}}$  (the transition state for interconverting  $sc\text{-}5^+$  and  $ac\text{-}5^+$ ), (c)  $\text{TS}_{\text{ReNg}}$  (the transition state for interconverting  $ac\text{-}7$  and  $sc\text{-}6$ ), (d)  $\text{TS}_{\text{ReNh}}$  (the transition state for interconverting  $sc\text{-}7$  and  $ac\text{-}6$ ), (e)  $ac\text{-}5'\text{-OCH}_3$ , (f)  $sc\text{-}5'\text{-OCH}_3$ , (g)  $ac\text{-}5\text{-OCH}_3$ , and (h)  $sc\text{-}5\text{-OCH}_3$ . Selected distances (Å) and N2-H1-O4 angles ( $^\circ$ ):  $\text{TS}_{\text{ReNe}}$ , Re-N1 2.604, Re-N2 2.517, N1-N2 1.398;  $\text{TS}_{\text{ReNf}}$ , Re-N1 2.587, Re-N2 2.524, N1-N2 1.398;  $\text{TS}_{\text{ReNg}}$ , Re-N1 2.344, Re-N2 2.432, N1-N2 1.356;  $\text{TS}_{\text{ReNh}}$ , Re-N1 2.436, Re-N2 2.313, N1-N2 1.361;  $ac\text{-}5'\text{-OCH}_3$ , Re-N2 2.097, N1-N2 1.361, N2-H1 2.380, O4-H1 0.965, N2-H1-O4 171.56;  $sc\text{-}5'\text{-OCH}_3$ , Re-N2 2.108, N1-N2 1.356, N2-H1 2.125, O4-H1 0.966, N2-H1-O4 165.45;  $ac\text{-}5\text{-OCH}_3$ , Re-N1 2.124, N1-N2 1.358, N2-H1 1.903, O4-H1 0.977, N2-H1-O4 153.49;  $sc\text{-}5\text{-OCH}_3$ , Re-N1 2.111, N1-N2 1.352, N2-H1 1.781, O4-H1 0.983, N2-H1-O4 173.85. See Table S7 for the energies.

### S3. Miscellaneous

**Table S7.** Relative gas-phase electronic energies, enthalpies, entropies, free energies, and solution-phase free energies (C<sub>6</sub>H<sub>5</sub>Cl) with solvation corrections at 1.0 atm or 1.0 M (both 298.15 K) for the species in Figures S1, S7, S8, 8, and 9 (main text).

|                                                                             | $\omega$ B97X-D/BS1 <sup>a</sup>     |                                      |                                       |                                      | $\omega$ B97X-D/BS2(CPCM)//<br>$\omega$ B97X-D/BS1 <sup>a,b</sup>    |                                                                    |
|-----------------------------------------------------------------------------|--------------------------------------|--------------------------------------|---------------------------------------|--------------------------------------|----------------------------------------------------------------------|--------------------------------------------------------------------|
|                                                                             | $\Delta E(\text{gas})$<br>(kcal/mol) | $\Delta H(\text{gas})$<br>(kcal/mol) | $\Delta S(\text{gas})$<br>(cal/K·mol) | $\Delta G(\text{gas})$<br>(kcal/mol) | $\Delta G(\text{C}_6\text{H}_5\text{Cl})$<br>(1.0 atm)<br>(kcal/mol) | $\Delta G(\text{C}_6\text{H}_5\text{Cl})$<br>(1.0 M)<br>(kcal/mol) |
| <i>ac-4</i> <sup>+</sup>                                                    | 0.0                                  | 0.0                                  | 0.0                                   | 0.0                                  | 0.0                                                                  | 0.0                                                                |
| <i>sc-4</i> <sup>+</sup>                                                    | 3.4                                  | 3.4                                  | 1.9                                   | 2.8                                  | 2.4                                                                  | 2.4                                                                |
| TS <sub>rot</sub> <sup>a</sup> <sup>c</sup>                                 | 5.0                                  | 4.4                                  | -5.8                                  | 6.2                                  | 6.0                                                                  | 6.0                                                                |
| <i>4'</i> <sup>+</sup>                                                      | 15.2                                 | 15.4                                 | -3.2                                  | 16.3                                 | 11.1                                                                 | 11.1                                                               |
| TS <sub>ReN</sub> <sup>d</sup>                                              | 30.3                                 | 29.2                                 | 1.6                                   | 28.7                                 | 27.1                                                                 | 27.1                                                               |
| <i>sc-5</i> <sup>+</sup>                                                    | 0.0                                  | 0.0                                  | 0.0                                   | 0.0                                  | 0.0                                                                  | 0.0                                                                |
| <i>ac-5</i> <sup>+</sup>                                                    | -3.1                                 | -2.9                                 | -6.3                                  | -1.0                                 | -1.2                                                                 | -1.2                                                               |
| TS <sub>rot</sub> <sup>b</sup> <sup>e</sup>                                 | 0.4                                  | -0.7                                 | -4.9                                  | 0.8                                  | 1.5                                                                  | 1.5                                                                |
| <i>sc-5'</i> <sup>+</sup>                                                   | 14.0                                 | 13.9                                 | -3.4                                  | 14.9                                 | 16.2                                                                 | 16.2                                                               |
| <i>ac-5'</i> <sup>+</sup>                                                   | 21.1                                 | 21.0                                 | -3.3                                  | 22.0                                 | 21.0                                                                 | 21.0                                                               |
| <i>sc-6</i>                                                                 | 0.0                                  | 0.0                                  | 0.0                                   | 0.0                                  | 0.0                                                                  | 0.0                                                                |
| <i>ac-6</i>                                                                 | 7.8                                  | 8.0                                  | -2.9                                  | 8.9                                  | 5.3                                                                  | 5.3                                                                |
| TS <sub>rot</sub> <sup>c</sup> <sup>f</sup>                                 | 10.4                                 | 9.8                                  | -10.8                                 | 13.1                                 | 10.9                                                                 | 10.9                                                               |
| <i>ac-5</i> <sup>+</sup> + <sup>-</sup> OCH <sub>3</sub> <sup>g</sup>       | 0.0                                  | 0.0                                  | 0.0                                   | 0.0                                  | 0.0                                                                  | 0.0                                                                |
| <i>sc-5</i> <sup>+</sup> + <sup>-</sup> OCH <sub>3</sub> <sup>g</sup>       | 3.1                                  | 2.9                                  | 6.3                                   | 1.0                                  | 1.2                                                                  | 1.2                                                                |
| TS <sub>ReN</sub> <sup>h</sup> + <sup>-</sup> OCH <sub>3</sub> <sup>g</sup> | 25.7                                 | 24.5                                 | -0.8                                  | 24.8                                 | 26.7                                                                 | 26.7                                                               |
| TS <sub>ReN</sub> <sup>i</sup> + <sup>-</sup> OCH <sub>3</sub> <sup>g</sup> | 29.8                                 | 28.6                                 | 5.8                                   | 26.9                                 | 29.5                                                                 | 29.5                                                               |
| <i>ac-5'</i> <sup>+</sup> + <sup>-</sup> OCH <sub>3</sub> <sup>j,g</sup>    | 24.2                                 | 23.9                                 | 2.9                                   | 23.1                                 | 22.2                                                                 | 22.2                                                               |
| <i>sc-5'</i> <sup>+</sup> + <sup>-</sup> OCH <sub>3</sub> <sup>k,g</sup>    | 17.0                                 | 16.8                                 | 2.9                                   | 15.9                                 | 17.3                                                                 | 17.3                                                               |
| <i>ac-5'</i> -OCH <sub>3</sub> <sup>j,l</sup>                               | -143.5                               | -140.1                               | -24.9                                 | -132.7                               | -42.4                                                                | -44.3                                                              |
| <i>sc-5'</i> -OCH <sub>3</sub> <sup>k,m</sup>                               | -153.9                               | -150.7                               | -29.5                                 | -141.9                               | -49.6                                                                | -51.5                                                              |
| <i>ac-6</i> + CH <sub>3</sub> OH <sup>l,g</sup>                             | -133.6                               | -131.8                               | 6.8                                   | -133.8                               | -50.1                                                                | -50.1                                                              |
| <i>sc-6</i> + CH <sub>3</sub> OH <sup>m,g</sup>                             | -141.4                               | -139.8                               | 9.7                                   | -142.7                               | -55.4                                                                | -55.4                                                              |
| <i>ac-5</i> <sup>+</sup> + <sup>-</sup> OCH <sub>3</sub> <sup>n,g</sup>     | 0.0                                  | 0.0                                  | 0.0                                   | 0.0                                  | 0.0                                                                  | 0.0                                                                |
| <i>sc-5</i> <sup>+</sup> + <sup>-</sup> OCH <sub>3</sub> <sup>o,g</sup>     | 3.1                                  | 2.9                                  | 6.3                                   | 1.0                                  | 1.2                                                                  | 1.2                                                                |
| <i>ac-5</i> -OCH <sub>3</sub> <sup>n,p</sup>                                | -150.1                               | -146.5                               | -34.6                                 | -136.2                               | -46.0                                                                | -47.9                                                              |
| <i>sc-5</i> -OCH <sub>3</sub> <sup>o,q</sup>                                | -153.9                               | -150.6                               | -29.9                                 | -141.7                               | -50.0                                                                | -51.9                                                              |

(continued)

Table S7 continued

|                                                                   | $\omega$ B97X-D/BS1 <sup>a</sup>     |                                      |                                       |                                      | $\omega$ B97X-D/BS2(CPCM)//<br>$\omega$ B97X-D/BS1 <sup>a,b</sup>    |                                                                    |
|-------------------------------------------------------------------|--------------------------------------|--------------------------------------|---------------------------------------|--------------------------------------|----------------------------------------------------------------------|--------------------------------------------------------------------|
|                                                                   | $\Delta E(\text{gas})$<br>(kcal/mol) | $\Delta H(\text{gas})$<br>(kcal/mol) | $\Delta S(\text{gas})$<br>(cal/K·mol) | $\Delta G(\text{gas})$<br>(kcal/mol) | $\Delta G(\text{C}_6\text{H}_5\text{Cl})$<br>(1.0 atm)<br>(kcal/mol) | $\Delta G(\text{C}_6\text{H}_5\text{Cl})$<br>(1.0 M)<br>(kcal/mol) |
| <i>ac-7</i> + CH <sub>3</sub> OH <sup>p,g</sup>                   | -131.9                               | -130.0                               | 0.7                                   | -130.2                               | -47.4                                                                | -47.4                                                              |
| <i>sc-7</i> + CH <sub>3</sub> OH <sup>q,g</sup>                   | -136.9                               | -135.2                               | 5.5                                   | -136.9                               | -50.7                                                                | -50.7                                                              |
| TS <sub>ReNg</sub> <sup>r</sup> + CH <sub>3</sub> OH <sup>g</sup> | -114.7                               | -114.1                               | 0.1                                   | -114.1                               | -29.8                                                                | -29.8                                                              |
| TS <sub>ReNh</sub> <sup>s</sup> + CH <sub>3</sub> OH <sup>g</sup> | -112.9                               | -112.3                               | 8.2                                   | -114.7                               | -28.1                                                                | -28.1                                                              |
| TS <sub>rot</sub> <sup>e</sup> + CH <sub>3</sub> OH <sup>g</sup>  | -131.0                               | -130.0                               | -1.1                                  | -129.6                               | -44.5                                                                | -44.5                                                              |
| <i>ac-6</i> + CH <sub>3</sub> OH <sup>g</sup>                     | -133.6                               | -131.8                               | 6.8                                   | -133.8                               | -50.1                                                                | -50.1                                                              |
| <i>sc-6</i> + CH <sub>3</sub> OH <sup>g</sup>                     | -141.4                               | -139.8                               | 9.7                                   | -142.7                               | -55.4                                                                | -55.4                                                              |

<sup>a</sup>BS1 = LANL2DZ+f for the rhenium atom and 6-31G(d,p) for non-metal atoms. <sup>b</sup>BS2 = LANL2TZ(f) for the rhenium atom and def2-TZVP for non-metal atoms. <sup>c</sup>The transition state for interconverting *ac-4*<sup>+</sup> and *sc-4*<sup>+</sup>. <sup>d</sup>The transition state for interconverting *ac-4*<sup>+</sup> and *4*<sup>+</sup>. <sup>e</sup>The transition state for interconverting *sc-5*<sup>+</sup> and *ac-5*<sup>+</sup>. <sup>f</sup>The transition state for interconverting *sc-6* and *ac-6*. <sup>g</sup>Separately computed species. <sup>h</sup>The transition state for interconverting *ac-5*<sup>+</sup> and *sc-5*<sup>+</sup>. <sup>i</sup>The transition state for interconverting *sc-5*<sup>+</sup> and *ac-5*<sup>+</sup>. <sup>j</sup>The estimated maximum barrier for the conversion of *ac-5*<sup>+</sup> and <sup>-</sup>OCH<sub>3</sub> to *ac-5*<sup>+</sup>-OCH<sub>3</sub> is 8.3 kcal/mol, based upon enthalpic limits ( $\Delta H(\text{C}_6\text{H}_5\text{Cl})$ ) provided in Table S8. <sup>k</sup>The estimated maximum barrier for the conversion of *sc-5*<sup>+</sup> and <sup>-</sup>OCH<sub>3</sub> to *sc-5*<sup>+</sup>-OCH<sub>3</sub> is 9.7 kcal/mol, based upon enthalpic limits ( $\Delta H(\text{C}_6\text{H}_5\text{Cl})$ ) provided in Table S8. <sup>l</sup>The estimated maximum barrier for the conversion of *ac-5*<sup>+</sup>-OCH<sub>3</sub> to *ac-6* and CH<sub>3</sub>OH is 1.8 kcal/mol, based upon enthalpic limits ( $\Delta H(\text{C}_6\text{H}_5\text{Cl})$ ) provided in Table S8. <sup>m</sup>The estimated maximum barrier for the conversion of *sc-5*<sup>+</sup>-OCH<sub>3</sub> to *sc-6* and CH<sub>3</sub>OH is 5.9 kcal/mol, based upon enthalpic limits ( $\Delta H(\text{C}_6\text{H}_5\text{Cl})$ ) provided in Table S8. <sup>n</sup>The estimated maximum barrier for the conversion of *ac-5*<sup>+</sup> and <sup>-</sup>OCH<sub>3</sub> to *ac-5*<sup>+</sup>-OCH<sub>3</sub> is 8.4 kcal/mol, based upon enthalpic limits ( $\Delta H(\text{C}_6\text{H}_5\text{Cl})$ ) provided in Table S8. <sup>o</sup>The estimated maximum barrier for the conversion of *sc-5*<sup>+</sup> and <sup>-</sup>OCH<sub>3</sub> to *sc-5*<sup>+</sup>-OCH<sub>3</sub> is 8.9 kcal/mol, based upon enthalpic limits ( $\Delta H(\text{C}_6\text{H}_5\text{Cl})$ ) provided in Table S8. <sup>p</sup>The estimated maximum barrier for the conversion of *ac-5*<sup>+</sup>-OCH<sub>3</sub> to *ac-7* and CH<sub>3</sub>OH is 9.1 kcal/mol, based upon enthalpic limits ( $\Delta H(\text{C}_6\text{H}_5\text{Cl})$ ) provided in Table S8. <sup>q</sup>The estimated maximum barrier for the conversion of *sc-5*<sup>+</sup>-OCH<sub>3</sub> to *sc-7* and CH<sub>3</sub>OH is 9.8 kcal/mol, based upon enthalpic limits ( $\Delta H(\text{C}_6\text{H}_5\text{Cl})$ ) provided in Table S8. <sup>r</sup>The transition state for interconverting *ac-7* and *sc-6*. <sup>s</sup>The transition state for interconverting *sc-7* and *ac-6*.

**Table S8.** Relative solution-phase entropies ( $C_6H_5Cl$ ) with solvation corrections at 1.0 atm (298.15 K) for the species in Figures S1, S8, 8, and 9 (main text).

|                                                                       | $\omega$ B97X-D/BS2(CPCM)//<br>$\omega$ B97X-D/BS1 <sup>a,b</sup> |
|-----------------------------------------------------------------------|-------------------------------------------------------------------|
|                                                                       | $\Delta H(C_6H_5Cl)$<br>(1.0 atm)<br>(kcal/mol)                   |
| <i>ac-5</i> <sup>+</sup> + <sup>-</sup> OCH <sub>3</sub> <sup>c</sup> | 0.0                                                               |
| <i>ac-5'</i> -OCH <sub>3</sub>                                        | 8.3                                                               |
| <i>sc-5</i> <sup>+</sup> + <sup>-</sup> OCH <sub>3</sub> <sup>c</sup> | 0.0                                                               |
| <i>sc-5'</i> -OCH <sub>3</sub>                                        | 9.7                                                               |
| <i>ac-5'</i> -OCH <sub>3</sub>                                        | 0.0                                                               |
| <i>ac-6</i> + CH <sub>3</sub> OH <sup>c</sup>                         | 1.8                                                               |
| <i>sc-5'</i> -OCH <sub>3</sub>                                        | 0.0                                                               |
| <i>sc-6</i> + CH <sub>3</sub> OH <sup>c</sup>                         | 5.9                                                               |
| <i>ac-5</i> <sup>+</sup> + <sup>-</sup> OCH <sub>3</sub> <sup>c</sup> | 0.0                                                               |
| <i>ac-5</i> -OCH <sub>3</sub>                                         | 8.4                                                               |
| <i>sc-5</i> <sup>+</sup> + <sup>-</sup> OCH <sub>3</sub> <sup>c</sup> | 0.0                                                               |
| <i>sc-5</i> -OCH <sub>3</sub>                                         | 8.9                                                               |
| <i>ac-5</i> -OCH <sub>3</sub>                                         | 0.0                                                               |
| <i>ac-7</i> + CH <sub>3</sub> OH <sup>c</sup>                         | 9.1                                                               |
| <i>sc-5</i> -OCH <sub>3</sub>                                         | 0.0                                                               |
| <i>sc-7</i> + CH <sub>3</sub> OH <sup>c</sup>                         | 9.8                                                               |

<sup>a</sup>BS1 = LANL2DZ+f for the rhenium atom and 6-31G(d,p) for non-metal atoms. <sup>b</sup>BS2 = LANL2TZ(f) for the rhenium atom and def2-TZVP for non-metal atoms. <sup>c</sup>Separately computed species.

**Table S9.** Crystallographic atom label changes for  $4^+ \text{BF}_4^- \cdot (\text{CH}_2\text{Cl}_2)_{0.5}$ .

| Original Label | New Label |
|----------------|-----------|
| Re1            | Re1       |
| P1             | P1        |
| N1             | N2        |
| N2             | N1        |
| N3             | N3        |
| O3             | O3        |
| B1             | B1        |
| F1             | F1        |
| F2             | F2        |
| F3             | F3        |
| F4             | F4        |

**Table S10.** Crystallographic atom label changes for  $5^+ \text{BF}_4^-$ .

| Original Label | New Label | Original Label | New Label | Original Label | New Label |
|----------------|-----------|----------------|-----------|----------------|-----------|
| Re1            | Re1       | C21            | C71       | C45            | C45       |
| P1             | P1        | C22            | C72       | C46            | C46       |
| N1             | N3        | C23            | C73       | C50            | C1        |
| N10            | N2        | C24            | C74       | C51            | C11       |
| N11            | N1        | C25            | C75       | C52            | C52       |
| O1             | O3        | C26            | C76       | C53            | C53       |
| B1             | B1        | C31            | C31       | C54            | C54       |
| F1             | F1        | C32            | C32       | C55            | C55       |
| F2             | F2        | C33            | C33       | C56            | C56       |
| F3             | F3        | C34            | C34       | C61            | C22       |
| F4             | F4        | C35            | C35       | C62            | C21       |
| C11            | C16       | C36            | C36       | C63            | C63       |
| C12            | C12       | C41            | C41       | C64            | C64       |
| C13            | C13       | C42            | C42       | C65            | C65       |
| C14            | C14       | C43            | C43       | C66            | C66       |
| C15            | C15       | C44            | C44       | H10A           | H1        |

**Table S11.** Crystallographic atom label changes for  $6 \cdot \text{CH}_2\text{Cl}_2$ .

| Original Label | New Label | Original Label | New Label | Original Label | New Label |
|----------------|-----------|----------------|-----------|----------------|-----------|
| Re1            | Re1       | C23            | C73       | C46            | C46       |
| P1             | P1        | C24            | C74       | C50            | C1        |
| N1             | N3        | C25            | C75       | C51            | C11       |
| N10            | N1        | C26            | C76       | C52            | C52       |
| N11            | N2        | C31            | C31       | C53            | C53       |
| O1             | O3        | C32            | C32       | C54            | C54       |
| Cl10           | Cl10      | C33            | C33       | C55            | C55       |
| Cl11           | Cl11      | C34            | C34       | C56            | C56       |
| C11            | C16       | C35            | C35       | C61            | C22       |
| C12            | C12       | C36            | C36       | C62            | C21       |
| C13            | C13       | C41            | C41       | C63            | C63       |
| C14            | C14       | C42            | C42       | C64            | C64       |
| C15            | C15       | C43            | C43       | C65            | C65       |
| C21            | C71       | C44            | C44       | C66            | C66       |
| C22            | C72       | C45            | C45       | C100           | C100      |



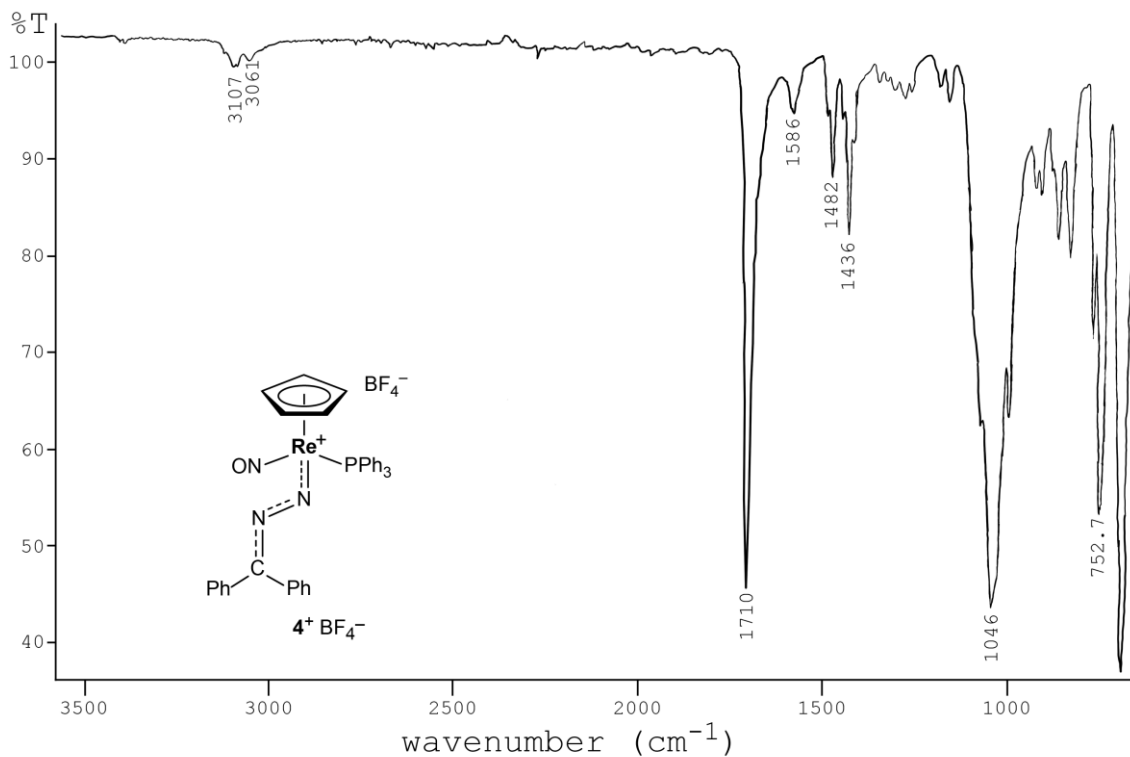

Figure S9. IR spectrum (powder film) of  $4^+ \text{BF}_4^-$ . The original spectrum was traced over to enhance visibility.

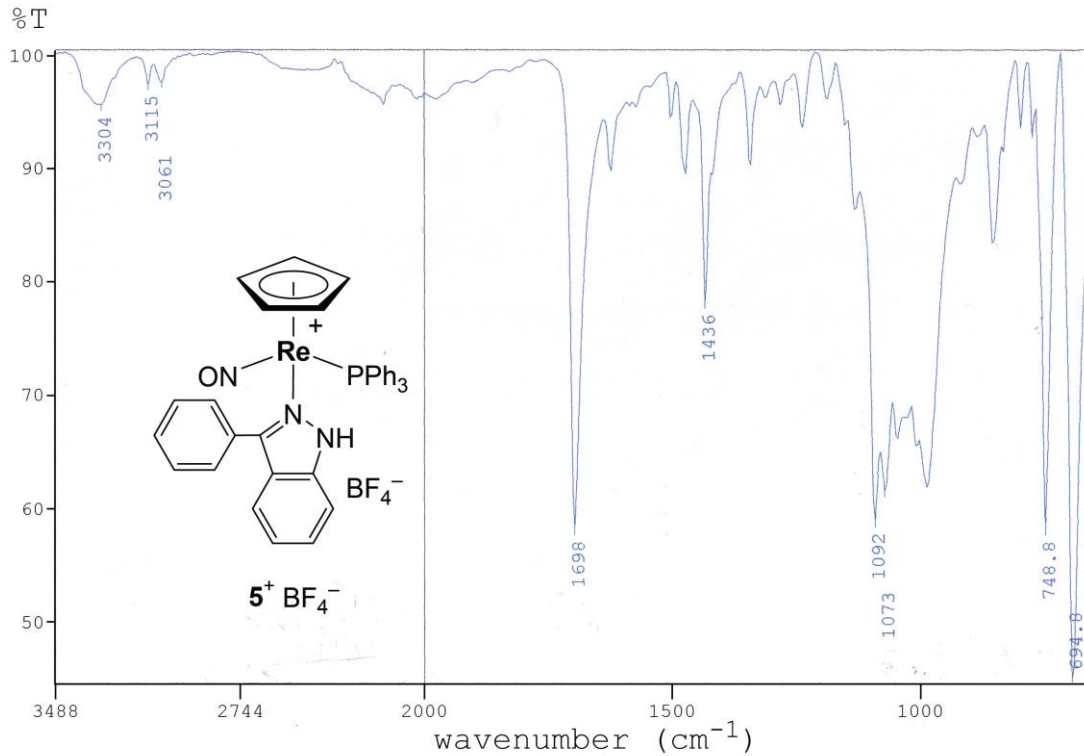

Figure S10. IR spectrum (powder film) of  $5^+ \text{BF}_4^-$ .

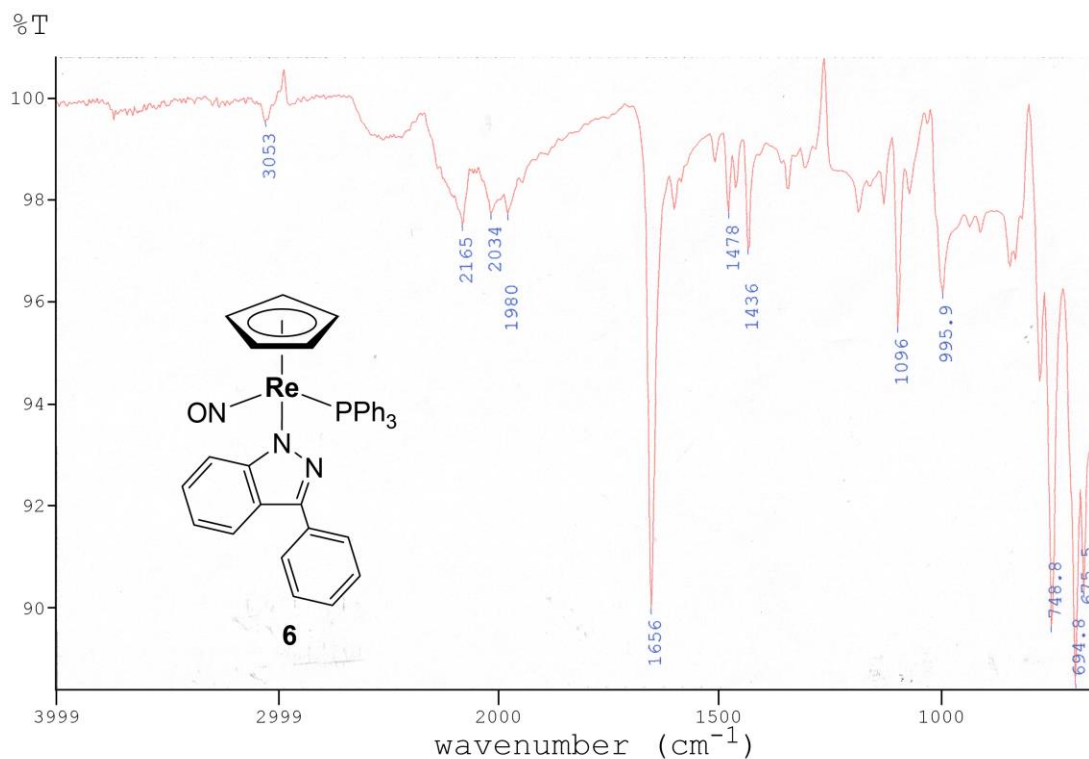

Figure S11. IR spectrum (powder film) of 6.

**Mixing NNCPPh<sub>2</sub> and copper under the conditions of Scheme 1.** A Schlenk flask was charged with chlorobenzene (30 mL), Et<sub>2</sub>O (0.118 mL), copper powder (0.030 g, 0.47 mmol), and adamantane (0.057 g, 0.417 mmol; NMR standard). The suspension was cooled to -42 °C, and a solution of NNCPPh<sub>2</sub> (0.486 g, 2.50 mmol) in pentanes (5.0 mL) was added via syringe. The mixture was stirred at -42 °C (1 h) and then room temperature (24 h). Aliquots were removed 1 h, 2 h, 3 h, and 25 h after NNCPPh<sub>2</sub> addition. These were immediately filtered through glass wool. A portion of each filtrate (0.50 mL) and chlorobenzene-*d*<sub>5</sub> (0.25 mL) were combined. The samples were analyzed by <sup>13</sup>C NMR. No reactions were observed, and the areas of the NNCPPh<sub>2</sub> signals remained constant relative to the standard.

## References

(s1) Yanai, T.; Tew, D. P.; Handy, N. C. A new hybrid exchange-correlation functional using the Coulomb-attenuating method (CAM-B3LYP). *Chem. Phys. Lett.* **2004**, *393*, 51-57.

(s2) Zhao, Y.; Truhlar, D. G. The M06 suite of density functionals for main group thermochemistry, thermochemical kinetics, noncovalent interactions, excited states, and transition elements: two new functionals and systematic testing of four M06-class functionals and 12 other functionals. *Theor. Chem. Acc.* **2008**, *120*, 215-241.

(s3) (a) Perdew, J. P. Density-functional approximation for the correlation energy of the inhomogeneous electron gas. *Phys. Rev. B: Condens. Matter Mater. Phys.* **1986**, *33*, 8822-8824.

(b) Becke, A. D. Density-functional exchange-energy approximation with correct asymptotic behavior. *Phys. Rev. A: At., Mol., Opt. Phys.* **1988**, *38*, 3098-3100.

(s4) Grimme, S.; Ehrlich, S.; Goerigk, L. Effect of the Damping Function in Dispersion Corrected Density Functional Theory. *J. Comput. Chem.* **2011**, *32*, 1456-1465.

(s5) Hartwig, J. F.; Cook, K. S.; Hapke, M.; Incarvito, C. D.; Fan, Y.; Webster, C. E.; Hall, M. B. Rhodium Boryl Complexes in the Catalytic, Terminal Functionalization of Alkanes. *J. Am. Chem. Soc.* **2005**, *127*, 2538-2552 (see especially Figure 10 therein).
